# Supplementary material
Source: PubMed Central journal article supplement (PMC3887859)
Supplement: molcell-35-5-402-6-supplementary.pdf [file molcell-35-5-402-6-supplementary.pdf]

- **Supplementary Fig. S1.** Nucleotide sequence of *ChrSy.fgenes.h.gene.28* coding region (A) and amino acid sequence of OsCpn60 $\beta$ 3 protein (B). Predicted sequences in public annotation database are in black. Red indicates sequences identified by sequencing cDNA.
- 
- **Supplementary Fig. S2.** Pair-wise identity scores among rice Cpn60 subunits, and phylogenetic tree of rice and *Arabidopsis* Cpn60 subunits. (A) Identity of amino acid sequences among rice Cpn60 subunits. Full-length amino acid sequences were aligned with each other and % identities were calculated by Blast2 tool. (B) Phylogenetic analysis. Rice and *Arabidopsis* chaperonin 60 subunits were aligned using ClustalW. Phylogenetic tree was constructed by MEGA software via neighbor-joining method.
- 
- **Supplementary Fig. S3.** Expression analysis of rice plastid *Cpn60* genes, based on data from rice oligonucleotide array database (<http://www.ricearray.org/>). *OsCpn60 $\beta$ 3* is absent from that database.
- 
- **Supplementary Fig. S4.** Response to cold stress. Seedlings (14-d-old) first grown in soil at constant 27°C were subjected to 10°C. Third leaves were sampled after 1, 4, 8, 12, and 24 h. *UBQ5* was internal control. Error bars indicate standard deviations; n = 3.

**A** **ATG**TCGAGGATTGCGGCGCCGCCGCCGCTCTCCGGCACCGGCAAGCCGCCACACTCCCCTTCTCCCTCAAGAAGCCGCCGC  
CCATGCCGGTGTACAAGGACCTGCACTTCAACCGCGACCTCTCCGCCACCAAGAAGCTGCAGGCCGGCGTGGACCTGGTGGCAGC  
GCTGGTCGGGGTGACGCTGGGGCCCAAGGGGAGGAACGTGGTGCTGAGCAACAAGTACGGCCCTCCAAGATCGTCAACGATGG  
GGAGACGGTCTCAAGGAGATTGAATTGGAGGACCCGTTGGAAAATCTTGGAGTGAAGCTGGTCAGACAGGCTGGTGCCAGGACG  
AACGATGTTGCTGGTGATGGTTGTACCACTTCCATAATCCTTGCTCAAGGCCTCATCGCTGAAGGAATGAAGGTGCTTGCAGCTGGA  
ATTAATCCTGTCCAGATTGCGCGGGGCATTGAGAAGACTGCTTCTGCTTTGGTGCTGAACTCAGATTGATGTCCCAGGAGATAGAA  
GACCATGAAATTGCACATGTGGCTGCAGTTAGTGCAGGAGATGATTATGCTGTTGGAATATGATTTCTGATGCTTTAAAAGAGTA  
GGCAGGAAAGGCATGGTGAGGATTGAAAATGGAAGGGGCACGGAAAATGGTCTAGAGATTGTGGAAGGAATGCAATTTGAACGT  
GGTTACCTCTCACCGTACTTTGTGACTGATTGTACAAATATGTCCGCGGAGTTTACTGACTGTAAGATATTGTTGGTTGACAAGAAA  
TTACTGATGCAAGTGAGATTATAAGGATATTGGATAGTGTCTGCAAGAAGATTATCCATTGTTGATAGTTGCCGAGGATGTGGAAG  
AAAAAGCAATGGCTGATTTGATAAAAAACAAGCTAAAAGGGACAATTAAGTGGCTGCAATCAAGGCCCTTCTTTGGGGAACAA  
ATGACTCAATGTTTGGATGACATTGCCATCATGACAGGAGGTACACTAGTGCCTGAAGACATGGGATATACTAGAAAAGGCAGG  
GAAAGAGGTTCTAGGTTCTGCTTCTAAGGTTGTAGTCGGGAAAGACTCAACACTAATTGTTACCGATGGAAGCACCAACATGTGAT  
CGAGAAAAGGGTTGCTCAGATAAAGGGCCAAATTGAGAATCAAGTGAAGGTTACCAGAAGAAGATATTGGGTGAGAGAATAGC  
AAGGTTATGTGGTGAATTGCAATCATTGAGTCCGGTCTCAAACAATCATTGAGATGAAAGACAAGAAGCTCAGAATTGAAGATG  
CCCTTAATGCAACAAAGGCAGCTATTGAGGAAGGAGTTGTGATAGGTGGTGGATGTAGCCTATTAAGATTATCCATGAAGATTGAT  
AGAATTAAGGAATCATTGGATAATATGGAGCAGAAG**ATTGGCGCTGACATCTTCAAACAGGCTTTGAGTTACCCTACTGCATTGATT**  
**GCAACAATGCTGGGGTGAACGGCAGCTTCGTATAGAAAAG**GGTGTATTAAATGAGGACAGTAGATATGGCTACAATGCTGCCAA  
GAACCGCTATGAGGACTTAATGGCCGCTGGAATATTAGATCCATCAAAGGTTGTGAGATGTTGCATAGAACATGCTGCTGTGGTCG  
CCAAGTCTTTTCTCACATCTGACGTGGTGATTGTTGAGGCGAAAGAAGGCAAACCAGTTCGCATAAGGCCCCCGATGCCTCCTAAA  
AGTTTGATACCCCAATGCCTGCTTCTGCTTACAGGAATTCGAGT**GTAG**

**B** MSRIAAPPPPLSGTGKPPTLPFSLKPPMPVYKDLHFNRDLSATKKLQAGVDLVARLVGVTLGPKGRNVVLSNKGPPKIVNDGETVLKEIE  
LEDPLENLGVKLVRQAGARTNDVAGDGCTTSIIAQLIAEGMKVLAAGINPVQIARGIEKTASALVSELRLMSREIEDHEIAHVAAVSAGDD  
YAVGNMISDAFKRVGRKGMVRIENGRGTENGLIVEGMQFERGYLSPYFVTDCTNMSAEFTDCKILLVDKKITDASEIIRILDSAVKEDYPLLI  
VAEDVEEKAMADLIKNKLGTIKVAAIKAPSFGEQMTQCLDDIAIMTGGTLVREDMGYTLKAGKEVLGSASKVVVGKDSTLIVTDGSTQHV  
IEKRVAQIKGQIENSSERYQKILGERIARLCGGIAIQVGAQTIIEMKDKKLRIEDALNATKAAIEEGVVIGGGCSLLRLSMKIDRIKESLDNMEQ  
**KIGADIFKQALSYPTALIANNAGVNGSFVIEK**VLLNEDSRYGYNAAKNRYEDLMAAGILDPSKVVRCCIEHAAVVAKSFLTSDVVIVEAKEGK  
PVRIRPPMPPKSLIPMPASASGIRV\*

**Supplementary Figure S1.**

**A**

| Subunits   | $\alpha 1$ | $\alpha 2$ | $\alpha 3$ | $\beta 1$ | $\beta 2$ | $\beta 3$ |
|------------|------------|------------|------------|-----------|-----------|-----------|
| $\alpha 1$ | 100        | 86         | 61         | 52        | 50        | 46        |
| $\alpha 2$ |            | 100        | 60         | 52        | 49        | 47        |
| $\alpha 3$ |            |            | 100        | 42        | 42        | 40        |
| $\beta 1$  |            |            |            | 100       | 84        | 66        |
| $\beta 2$  |            |            |            |           | 100       | 61        |
| $\beta 3$  |            |            |            |           |           | 100       |

**B**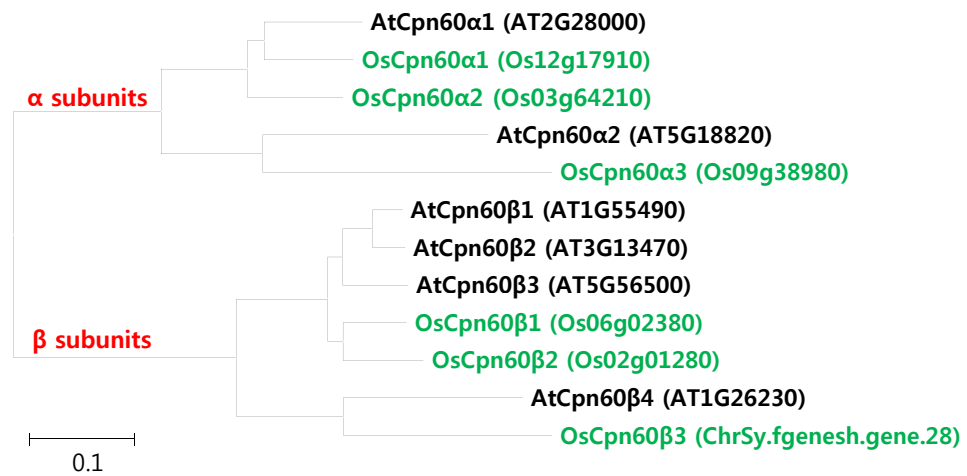

Supplementary Figure S2.

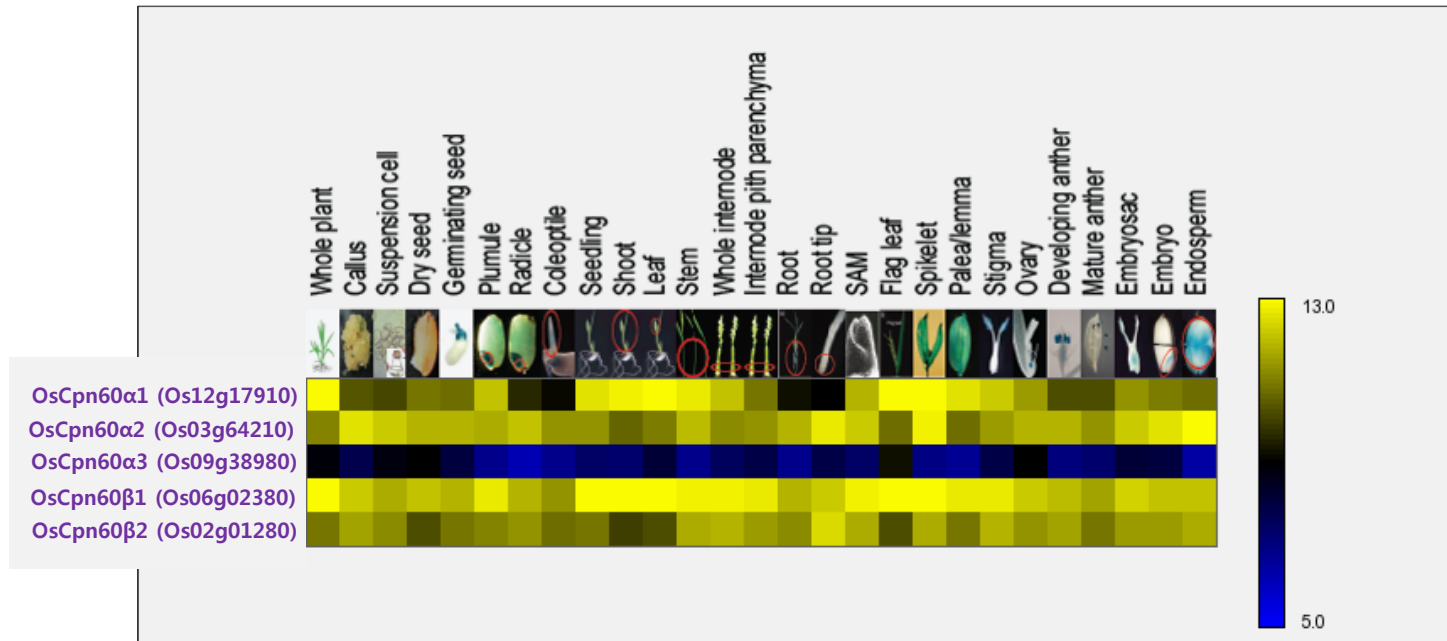

Supplementary Figure S3.

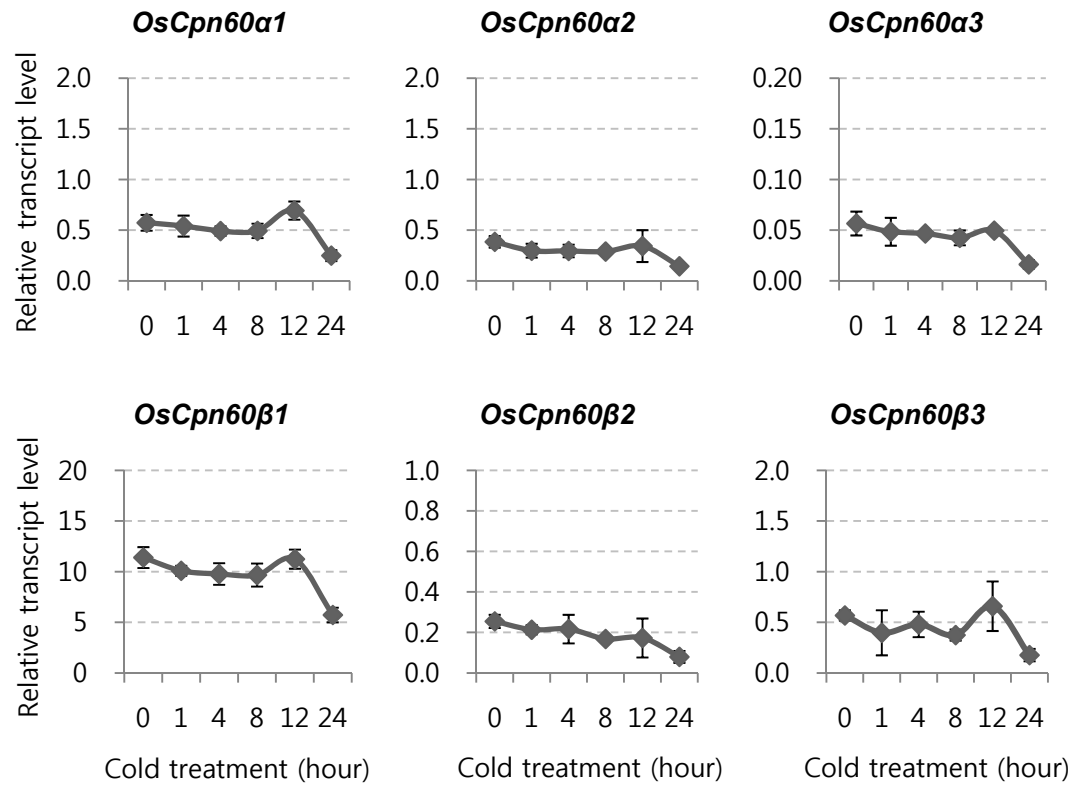

Supplementary Figure S4.
